# Supplementary material for: Of Retinoids and Organotins: The Evolution of the Retinoid X Receptor in Metazoa
Source: PubMed Central journal article supplement (PMC7225927; doi:10.3390/biom10040594), 2020-04-11
Supplement: biomolecules-10-00594-s001.pdf [file biomolecules-10-00594-s001.pdf]

# Supplementary Material

## Of Retinoids and Organotins: the Evolution of the Retinoid X Receptor in Metazoa

Elza Fonseca <sup>1,2</sup>, Raquel Ruivo <sup>1</sup>, Débora Borges <sup>1</sup>, João N. Franco <sup>1</sup>, Miguel M. Santos <sup>1,2,\*</sup> and L. Filipe C. Castro <sup>1,2,\*</sup>

<sup>1</sup> Interdisciplinary Centre of Marine and Environmental Research, University of Porto, 4450-208 Matosinhos, Portugal; [fonseca.ess@gmail.com](mailto:fonseca.ess@gmail.com) (E.F.); [ruivo.raquel@gmail.com](mailto:ruivo.raquel@gmail.com) (R.R.); [deboraborges@ciimar.up.pt](mailto:deboraborges@ciimar.up.pt) (D.B.); [joaonunofranco@gmail.com](mailto:joaonunofranco@gmail.com) (J.N.F.)

<sup>2</sup> Department of Biology, Faculty of Sciences, University of Porto, 4169-007 Porto, Portugal

\* Correspondence: [filipe.castro@ciimar.up.pt](mailto:filipe.castro@ciimar.up.pt) (L.F.C.C.), [santos@ciimar.up.pt](mailto:santos@ciimar.up.pt) (M.M.S.); Tel.: +351-223-401-800

**Table S1.** List of primers used to isolate *RXR* genes. F, forward; R, reverse.

| Species                        | Use         |                       | Primer sequences (5'→3')     |
|--------------------------------|-------------|-----------------------|------------------------------|
|                                | Degenerate  | F                     | GCAGCTGGTCACCCTGGTNGARTGGGC  |
|                                |             | R                     | GGCAGCCCAGCTCGGTYTTRTCCAT    |
| <i>Phoronopsis californica</i> | 5' RACE     | R1                    | TACCAACGCCTGCTTGATGAGCACT    |
|                                |             | R2                    | TGAAGTGAGGCACCCTTTAGCCCA     |
|                                | 3' RACE     | F1                    | TGGGCTAAAAGGGTGCCTCACTTCA    |
|                                |             | F2                    | GCAGGCGTTGGTACCATATTGACAG    |
|                                | Full ORF    | F                     | GTGAAATGAAAAATGGATAGATC      |
|                                |             | R                     | CTAACTGACAGGACTCGG           |
| <i>Megathiris detruncata</i>   | 5' RACE     | R1                    | GAACATGTAAACCTGTAGCAAGCAGG   |
|                                |             | R2                    | GCAATTAGGAGTTCATTCCAGCCAGC   |
|                                |             | R3                    | TTCTTTCATCTCGACAGGCGTAGG     |
|                                | 3' RACE     | F1                    | CCTGCTTGCTACAGGTTTACATGTTC   |
|                                |             | F2                    | CTGAACTGGTAGCTAAGATGAGAGAA   |
|                                | Full ORF    | F                     | ATGGGTACTATAACATGGGTA        |
| R                              |             | TCATGTTGTTGGGCTGGGA   |                              |
| <i>Bonellia viridis</i>        | 5' RACE     | R1                    | CGATCAGCAACTCATTCCAACCTGC    |
|                                |             | R2                    | CCAGGCACTTCATGTAGCGGCAGTA    |
|                                |             | R3                    | TTGCACCCTTCGCAGCTGTAAACAC    |
|                                | Full ORF    | F                     | ATGCACGGTAACAGACAGC          |
|                                |             | R                     | TCATGTGTTGGTCTGGAGAG         |
| <i>Bugula neritina 1</i>       | Partial ORF | F                     | CGTGTCGAGATGACAAATGC         |
|                                |             | R1                    | GTCGAAAGATTGTCCCTACGC        |
|                                |             | R2                    | CTATACTGCGCAAGGCAGGT         |
|                                | 5' RACE     | R1                    | GTCGACGTAAGAGAGTTGCTTGGCTC   |
|                                |             | R2                    | TCTGTCTGTGCTGCTCAGTACAGCGTC  |
|                                |             | R3                    | CACGCAGCATTGTTCATCTCGACAC    |
|                                |             | R4                    | TGAGGTGAACCGAGGCTTGAGTGAG    |
|                                | 3' RACE     | F1                    | GAGCCAAGCAACTCTCAGTACGTCGAC  |
|                                |             | F2                    | CAGATCCATGGCTGTCAAGATGGAATAC |
|                                | Full ORF    | F                     | CTAACCGTCAAATGAATGGTC        |
| R                              |             | TTATTGCAGAGGGGCTTCTAA |                              |
| <i>Bugula neritina 2</i>       | 5' RACE     | R1                    | TGTTGGTGAGAGGGTCCGAGGCTAT    |
|                                |             | R2                    | CCGTCTCCGTGACTGTTGGACTTTG    |
|                                | 3' RACE     | F1                    | AGCTCACCTGTCTCAAGGCCATCGT    |
|                                |             | F2                    | CCGGCAGGTTTGCTAAGCTCCTTCT    |
|                                | Full ORF    | F                     | ATGGGGATGAATGGAGCG           |
|                                |             | R                     | CTAAGAGAGGTTGTGTGG           |
| <i>Xenoturbella bocki</i>      | Partial ORF | F                     | CAATCTGTGCTATTTGTGGTG        |
|                                |             | R                     | CATCTCCATCAAGAACGAATC        |
|                                | 5' RACE     | R1                    | TCCACTCCCAGCTCAGCCTCTAGGA    |
|                                |             | R2                    | CAGTGTGGCAGCGATTCTCTGTT      |

|          |    |                           |
|----------|----|---------------------------|
|          | R3 | CCGGAGATGTTGTGAGTAAGAGTGG |
| 3' RACE  | F1 | GAGTCCTCACAGAGCTCGTCGCAAA |
|          | F2 | ACTAACGCAGACGACCCAGCAGAT  |
| Full ORF | F  | CAGTACAATGAATCCCATAGG     |
|          | R  | GTAAAGCCATCGTTGTTGTTG     |

**Table S2.** List of primers used to amplify *RXR* hinge and LBD regions to be cloned into pBIND expression vector. F, Forward; R, Reverse.

| Species                        |   | Primer sequences (5'→3')          | Restriction Enzymes |
|--------------------------------|---|-----------------------------------|---------------------|
| <i>Homo sapiens</i> $\alpha$   | F | aattTCTAGAGCCGTGCAGGAGGAGCGGCA    | XbaI                |
|                                | R | aattGGTACCAGTCATTTGGTGCGGCGCCT    | KpnI                |
| <i>Bonellia viridis</i>        | F | aaaGGATCCGACAGCGAGTCAAGGAGAA      | BamHI               |
|                                | R | aaaGGTACCTCATGTGTTGGTCTGGAGAG     | KpnI                |
| <i>Phoronopsis californica</i> | F | aaaGGATCCTGAGAGCGAGGGATGGTC       | BamHI               |
|                                | R | tgTCTAGACTAACTGACAGGACTCGG        | XbaI                |
| <i>Megathiris detruncata</i>   | F | aattGGATCCAGAGAGGCAAAGATGGAAAGG   | BamHI               |
|                                | R | aattGGTACCTCATGTTGTTGGGCTGGGAG    | KpnI                |
| <i>Bugula neritina</i> 1       | F | atcgGGATCCACAGACGAAACACAGCTGAC    | BamHI               |
|                                | R | aattCGGCGCGCTTATTGCAGAGGGGCTTCTAA | NotI                |
| <i>Bugula neritina</i> 2       | F | cccTCTAGAGATCCAAAGTCCAACAGTCA     | XbaI                |
|                                | R | aaaGGTACCCTAAGAGAGGTGTGTGTGG      | KpnI                |
| <i>Priapulius caudatus</i>     | F | aaaTCTAGACAGCGCGTGAAGGAGAAG       | XbaI                |
|                                | R | aaaGGTACCCTACTCGCTGTGCTCTC        | KpnI                |
| <i>Xenoturbella bocki</i>      | F | gagTCTAGACAGAGGCCGAAAGATAACA      | XbaI                |
|                                | R | aaaGGTACCTTAAGCCATCGTTGTTGTTGA    | KpnI                |
| <i>Trichoplax adhaerens</i>    | F | atcGGATCCGCGTAAAGAATAGCACACCAA    | BamHI               |
|                                | R | aaaGGTACCTTAAGAACTGCCTGTTTCCAG    | KpnI                |
| <i>Aurelia aurita</i>          | F | atcgTCTAGAGAGTCAACGAAAAGAAAAGCAG  | XbaI                |
|                                | R | atatGGTACCTTAAGGCTGCGTGACCTCC     | KpnI                |

**Table S3.** Ratio between firefly and *Renilla* luciferase luminescent values.

|                                | Condition | Mean   | SEM   |
|--------------------------------|-----------|--------|-------|
| <i>Homo sapiens</i>            | Control   | 0.890  | 0.047 |
|                                | 9cisRA    | 24.085 | 1.282 |
| <i>Megathiris detruncata</i>   | Control   | 0.225  | 0.041 |
|                                | 9cisRA    | 13.752 | 3.155 |
| <i>Bonellia viridis</i>        | Control   | 0.647  | 0.053 |
|                                | 9cisRA    | 4.911  | 0.188 |
| <i>Phoronopsis californica</i> | Control   | 0.334  | 0.021 |
|                                | 9cisRA    | 5.647  | 0.832 |
| <i>Bugula neritina 1</i>       | Control   | 0.240  | 0.033 |
|                                | 9cisRA    | 3.390  | 0.884 |
| <i>Bugula neritina 2</i>       | Control   | 0.430  | 0.196 |
|                                | 9cisRA    | 0.601  | 0.239 |
| <i>Priapulus caudatus</i>      | Control   | 0.392  | 0.096 |
|                                | 9cisRA    | 0.839  | 0.263 |
| <i>Xenoturbella bocki</i>      | Control   | 0.238  | 0.025 |
|                                | 9cisRA    | 0.431  | 0.042 |
| <i>Trichoplax adhaerens</i>    | Control   | 0.969  | 0.216 |
|                                | 9cisRA    | 21.092 | 8.742 |
| <i>Aurelia aurita</i>          | Control   | 0.369  | 0.065 |
|                                | 9cisRA    | 0.876  | 0.121 |
